# Supplementary material for: Unexpected diradical character and large magnetic spin coupling in modified porphyrins induced by inverting pyrrole rings
Source: Royal Society of Chemistry journal article supplement (doi:10.1039/c9cp02691f), 2019-01-01
Supplement: c9cp02691f1.pdf [file c9cp02691f1.pdf]

## **Unexpected Diradical Character and Large Magnetic Spin Coupling in Modified Porphyrins Induced through Inverting Pyrrole Rings**

Qi Wang, Meiyu Song, Xinyu Song\*, Yuxiang Bu

*School of Chemistry and Chemical Engineering, Shandong University, Jinan, 250100,  
Peoples' Republic of China*

### **Supplementary Materials**

#### **Contents**

- 1. All Calculated Data (Including Total Energies of Relevant States, Deprotonation and Dehydrogenation Energies, Ionization Potentials, and Magnetic Spin Coupling Constants J, N-Methylation Effect, Meso-Tetraphenyl Substituent Effect)**
- 2. The CH/NH Exchange Effect Process Analyses**
- 3. The Pure Geometric Deformation Effect Process Analyses**
- 4. The Optimized Bond Lengths of the N-Zn, C-Zn, N-Mg and C-Mg Bonds**
- 5. The Spin Density Map and Spin Alternation Analysis**
- 6. The NICS(1) Values of All Porphyrin and Derivative**
- 7. The Optimized Molecular Structures**

## 1. All Calculated Data

(Including Total Energies of Relevant States, Deprotonation and Dehydrogenation Energies, Ionization Potentials, and Magnetic Spin Coupling Constants  $J$ , N-Methylation Effect, Meso-Tetraphenyl Substituent Effect)

**Table S1.** The Calculated Energies of the Closed-Shell Singlet ( $E_{(CS)}/\text{au}$ ), Broken-Symmetry Open-Shell Singlet ( $E_{(BS)}/\text{au}$ ) Ground States and Triplet ( $E_{(T)}/\text{au}$ ) at the B3LYP/6-311G (d,p) Level

| Molecules     | $E_{(CS)}$    | $E_{(BS)}$ ( $\langle S^2 \rangle$ ) | $E_{(T)}$ ( $\langle S^2 \rangle$ ) |
|---------------|---------------|--------------------------------------|-------------------------------------|
| <b>2H</b>     | -989.7867605  | -989.7867605 (0.000)                 | -989.7298405 (2.059)                |
| <b>N-2H</b>   | -989.7479343  | -989.7479343 (0.000)                 | -989.7154869 (2.074)                |
| <b>1NN-2H</b> | -989.7016803  | -989.7032246 (0.511)                 | -989.6964364 (2.116)                |
| <b>2NN-2H</b> | -989.7019712  | -989.7035074 (0.511)                 | -989.6966646 (2.115)                |
| <b>Mg</b>     | -1188.8402772 | -1188.8402772(0.000)                 | -1188.7762747(2.045)                |
| <b>N-Mg</b>   | -1188.7581375 | -1188.7581377 (0.000)                | -1188.7244456 (2.052)               |
| <b>1NN-Mg</b> | -1188.6659929 | -1188.6667299 (0.390)                | -1188.6605620 (2.099)               |
| <b>2NN-Mg</b> | -1188.6661380 | -1188.6668818 (0.395)                | -1188.6609518 (2.098)               |
| <b>Zn</b>     | -2767.9919302 | -2767.9919302 (0.000)                | -2767.9272483 (2.045)               |
| <b>N-Zn</b>   | -2767.9275688 | -2767.9275690 (0.000)                | -2767.8924773 (2.057)               |
| <b>1NN-Zn</b> | -2767.8581313 | -2767.8585592 (0.300)                | -2767.8499836 (2.102)               |
| <b>2NN-Zn</b> | -2767.8585974 | -2767.8589703 (0.283)                | -2767.8502343 (2.100)               |

**Table S2.** The Single Point Calculated Energies of the Broken-Symmetry Open-Shell Singlet ( $E_{(BS)}/\text{au}$ ) Ground States and Triplet ( $E_{(T)}/\text{au}$ ) and the Corresponding Coupling Constants  $J$  ( $\text{cm}^{-1}$ ) at the B3LYP/6-311G (d,p) Level. This Is to Examine only the NH/CH Exchange (Geometry Unrelaxed) Effect and the Exchange Modes Are Displayed in Figure S1.

| Molecules     | $E_{(BS)}$    | ( $\langle S^2 \rangle$ ) | $E_{(T)}$     | ( $\langle S^2 \rangle$ ) | $J$ ( $\text{cm}^{-1}$ ) |
|---------------|---------------|---------------------------|---------------|---------------------------|--------------------------|
| <b>1NN-2H</b> | -989.6696329  | (0.557)                   | -989.6659695  | (2.117)                   | -551.31                  |
| <b>2NN-2H</b> | -989.6697295  | (0.556)                   | -989.6644444  | (2.124)                   | -739.66                  |
| <b>1NN-Mg</b> | -1188.6444999 | (0.324)                   | -1188.6384367 | (2.094)                   | -751.76                  |
| <b>2NN-Mg</b> | -1188.6445609 | (0.322)                   | -1188.6387164 | (2.094)                   | -724.01                  |
| <b>1NN-Zn</b> | -2767.8248267 | (0.000)                   | -2767.8198226 | (2.097)                   | -                        |
| <b>2NN-Zn</b> | -2767.8248267 | (0.000)                   | -2767.8164308 | (2.099)                   | -                        |

**Table S3.** The Single Point Calculated Energies of the Broken-Symmetry Open-Shell Singlet ( $E_{(BS)}/au$ , in fact a Closed-Shell State) Ground States and Triplet ( $E_{(T)}/au$ ) and the Corresponding Coupling Constants  $J$  ( $cm^{-1}$ ) at the B3LYP/6-311G (d,p) Level. This Is Only to Examine the Deformation Effect and the Deformation Modes Are Displayed in Figure S2.

| Molecules | $E_{(BS)}=E_{(CS)}$ | $\langle S^2 \rangle_{(BS)}$ | $E_{(T)}$     | $\langle S^2 \rangle_{(T)}$ | $J$ ( $cm^{-1}$ ) |
|-----------|---------------------|------------------------------|---------------|-----------------------------|-------------------|
| 1NN-2H    | -989.7513696        | 0.0                          | -989.6981437  | 2.059                       | -                 |
| 2NN-2H    | -989.7511626        | 0.0                          | -989.6981773  | 2.057                       | -                 |
| 1NN-Mg    | -1188.8182576       | 0.0                          | -1188.7543353 | 2.049                       | -                 |
| 2NN-Mg    | -1188.8181599       | 0.0                          | -1188.7545136 | 2.045                       | -                 |
| 1NN-Zn    | -2767.9621559       | 0.0                          | -2767.8985145 | 2.050                       | -                 |
| 2NN-Zn    | -2767.9619093       | 0.0                          | -2767.8986995 | 2.047                       | -                 |

**Table S4.** The Calculated Energies of the Broken-Symmetry Open-Shell Singlet ( $E_{(BS)}/au$ ) Ground States and Triplet ( $E_{(T)}/au$ ) and the Corresponding Coupling Constants  $J$  ( $cm^{-1}$ ) for All Dipyrrole-Inverted Porphine/Porphyrin and Their Doubly-Deprotonated and Doubly-Dehydrogenated Ones at the B3LYP/6-311G (d,p) Level.

| Molecules                               | $E_{(BS)}$    | $\langle S^2 \rangle$ | $E_{(T)}$     | $\langle S^2 \rangle$ | $J$ ( $cm^{-1}$ ) |
|-----------------------------------------|---------------|-----------------------|---------------|-----------------------|-------------------|
| 1NN-2H                                  | -989.7032246  | (0.511)               | -989.6964364  | (2.116)               | -928.2            |
| (1NN-2H) <sup>2-</sup> -2H <sup>+</sup> | -988.5260484  | (0.0)                 | -988.4919870  | (2.072)               | -                 |
| (1NN-2H)-2H                             | -988.4473880  | (0.0)                 | -988.4351435  | (2.046)               | -                 |
| 2NN-2H                                  | -989.7035074  | (0.511)               | -989.6966646  | (2.115)               | -936.3            |
| (2NN-2H) <sup>2-</sup> -2H <sup>+</sup> | -988.5259094  | (0.0)                 | -988.4927354  | (2.071)               | -                 |
| (2NN-2H)-2H                             | -988.4508088  | (0.0)                 | -988.4325330  | (2.007)               | -                 |
| 1NN-Mg                                  | -1188.6667299 | (0.390)               | -1188.6605620 | (2.099)               | -796.3            |
| (1NN-Mg) <sup>2-</sup> -2H <sup>+</sup> | -1187.4807264 | (0.0)                 | -1187.4460059 | (2.058)               | -                 |
| (1NN-Mg)-2H                             | -1187.4083915 | (0.0)                 | -1187.3942922 | (2.053)               | -                 |
| 2NN-Mg                                  | -1188.6668818 | (0.395)               | -1188.6609518 | (2.098)               | -764.2            |
| (2NN-Mg) <sup>2-</sup> -2H <sup>+</sup> | -1187.4803952 | (0.0)                 | -1187.4478763 | (2.063)               | -                 |
| (2NN-Mg)-2H                             | -1187.4111067 | (0.0)                 | -1187.3906201 | (2.006)               | -                 |
| 1NN-Zn                                  | -2767.8585592 | (0.300)               | -2767.8499836 | (2.102)               | -1044.5           |
| (1NN-Zn) <sup>2-</sup> -2H <sup>+</sup> | -2766.6746091 | (0.0)                 | -2766.6376523 | (2.059)               | -                 |
| (1NN-Zn)-2H                             | -2766.6015066 | (0.0)                 | -2766.5873631 | (2.051)               | -                 |
| 2NN-Zn                                  | -2767.8589703 | (0.283)               | -2767.8502343 | (2.100)               | -1055.2           |
| (2NN-Zn) <sup>2-</sup> -2H <sup>+</sup> | -2766.6744441 | (0.0)                 | -2766.6391572 | (2.061)               | -                 |
| (2NN-Zn)-2H                             | -2766.6045799 | (0.0)                 | -2766.5840132 | (2.007)               | -                 |

**Table S5.** The Calculated Energies of the Broken-Symmetry Open-Shell Singlet ( $E_{(BS)}/\text{au}$ ) Ground States and Triplet ( $E_{(T)}/\text{au}$ ) and the Corresponding Coupling Constants  $J$  ( $\text{cm}^{-1}$ ) for All Dipyrrole-Inverted Meso-Tetraphenyl-Substituted Porphine/Porphyrin and Their Doubly-Deprotonated and Doubly-Dehydrogenated Ones at the B3LYP/6-311G (d,p) Level

| Molecules                                                                            | $E_{(BS)}$ ( $\langle S^2 \rangle$ ) | $E_{(T)}$ ( $\langle S^2 \rangle$ ) | $J$ ( $\text{cm}^{-1}$ ) |
|--------------------------------------------------------------------------------------|--------------------------------------|-------------------------------------|--------------------------|
| (1NN-2H)(C <sub>6</sub> H <sub>5</sub> ) <sub>4</sub>                                | -1914.1293096 (0.476)                | -1914.1246773 (2.100)               | -625.8                   |
| (1NN-2H)(C <sub>6</sub> H <sub>5</sub> ) <sub>4</sub> <sup>2-</sup> -2H <sup>+</sup> | -1912.9708186 (0.0)                  | -1912.9257395 (2.049)               | -                        |
| (1NN-2H)(C <sub>6</sub> H <sub>5</sub> ) <sub>4</sub> -2H                            | -1912.8718680 (0.0)                  | -1912.8546207 (2.042)               | -                        |
| (2NN-2H)(C <sub>6</sub> H <sub>5</sub> ) <sub>4</sub>                                | -1914.1315934 (0.474)                | -1914.1243511 (2.101)               | -976.7                   |
| (2NN-2H)(C <sub>6</sub> H <sub>5</sub> ) <sub>4</sub> <sup>2-</sup> -2H <sup>+</sup> | -1912.9711119 (0.0)                  | -1912.9318841(2.045)                | -                        |
| (2NN-2H)(C <sub>6</sub> H <sub>5</sub> ) <sub>4</sub> -2H                            | -1912.8754839 (0.0)                  | -1912.8507080 (2.006)               | -                        |
| (1NN-Mg)(C <sub>6</sub> H <sub>5</sub> ) <sub>4</sub>                                | -2113.0925113 (0.324)                | -2113.0855622 (2.089)               | -864.7                   |
| (1NN-Mg)(C <sub>6</sub> H <sub>5</sub> ) <sub>4</sub> <sup>2-</sup> -2H <sup>+</sup> | -2111.9239939 (0.0)                  | -2111.8908288 (2.042)               | -                        |
| (1NN-Mg)(C <sub>6</sub> H <sub>5</sub> ) <sub>4</sub> -2H                            | -2111.8317216 (0.0)                  | -2111.8114885 (2.048)               | -                        |
| (2NN-Mg)(C <sub>6</sub> H <sub>5</sub> ) <sub>4</sub>                                | -2113.0941878 (0.309)                | -2113.0872061 (2.085)               | -862.6                   |
| (2NN-Mg)(C <sub>6</sub> H <sub>5</sub> ) <sub>4</sub> <sup>2-</sup> -2H <sup>+</sup> | -2111.9252482 (0.0)                  | -2111.8727366 (2.041)               | -                        |
| (2NN-Mg)(C <sub>6</sub> H <sub>5</sub> ) <sub>4</sub> -2H                            | -2111.8371174 (0.0)                  | -2111. 809763 (2.007)               | -                        |
| (1NN-Zn)(C <sub>6</sub> H <sub>5</sub> ) <sub>4</sub>                                | -3692.2854829 (0.263)                | -3692.2796020 (2.085)               | -708.2                   |
| (1NN-Zn)(C <sub>6</sub> H <sub>5</sub> ) <sub>4</sub> <sup>2-</sup> -2H <sup>+</sup> | -3691.1186755 (0.0)                  | -3691.0853875 (2.048)               | -                        |
| (1NN-Zn)(C <sub>6</sub> H <sub>5</sub> ) <sub>4</sub> -2H                            | -3691.0263346 (0.0)                  | -3691.0045836(2.054)                | -                        |
| (2NN-Zn)(C <sub>6</sub> H <sub>5</sub> ) <sub>4</sub>                                | -3692.2859198 (0.246)                | -3692.2797979 (2.084)               | -730.9                   |
| (2NN-Zn)(C <sub>6</sub> H <sub>5</sub> ) <sub>4</sub> <sup>2-</sup> -2H <sup>+</sup> | -3691.1186908 (0.0)                  | -3691.0873897 (2.048)               | -                        |
| (2NN-Zn)(C <sub>6</sub> H <sub>5</sub> ) <sub>4</sub> -2H                            | -3691.0284356 (0.0)                  | -3691.0050067 (2.053)               | -                        |

**Table S6.** The Calculated Energies (in au) of the Broken-Symmetry Open-Shell Singlet ( $E_{(BS)}/\text{au}$ ) Ground and Triplet ( $E_{(T)}/\text{au}$ ) States and the Coupling Constants  $J$  ( $\text{cm}^{-1}$ ) for All Dipyrrole-Inverted N-Methylated Porphine/Porphyrins at the B3LYP/6-311G(d,p) Level

| Molecules              | $E_{(BS)}$ ( $\langle S^2 \rangle$ ) | $E_{(T)}$ ( $\langle S^2 \rangle$ ) | $J$ ( $\text{cm}^{-1}$ ) |
|------------------------|--------------------------------------|-------------------------------------|--------------------------|
| 1NNCH <sub>3</sub> -2H | -1068.3419276 (0.443)                | -1068.3345313 (2.115)               | -971.0                   |
| 2NNCH <sub>3</sub> -2H | -1068.3422379 (0.453)                | -1068.3348564 (2.112)               | -976.6                   |
| 1NNCH <sub>3</sub> -Mg | -1267.3054690 (0.319)                | -1267.2986847 (2.097)               | -837.5                   |
| 2NNCH <sub>3</sub> -Mg | -1267.3057057 (0.322)                | -1267.2990313 (2.095)               | -826.4                   |
| 1NNCH <sub>3</sub> -Zn | -2846.4972443 (0.211)                | -2846.4879481 (2.099)               | -1080.3                  |
| 2NNCH <sub>3</sub> -Zn | -2846.4977119 (0.197)                | -2846.4882313 (2.097)               | -1094.8                  |

**Table S7.** The Calculated Energies of the Ground States (**E**/au) and N-hydrogen Single Hydrogen Dissociation Energies ( $\Delta E_{(-H)}$ /eV) or N-proton Single Proton Dissociation Energies ( $\Delta E_{(-H^+)}$ /eV) for All Dipyrrole-Inverted Porphine/Porphyrins at the B3LYP/6-311G (d,p) Level

| <b>Molecules</b>                          | <b>E</b>                | $\Delta E_{(-H)}$ | $\Delta E_{(-H^+)}$ |
|-------------------------------------------|-------------------------|-------------------|---------------------|
| <b>1NN-2H</b>                             | -989.7032246 (BS)       | 3.23              | 14.58               |
| <b>(1NN-2H)-H</b>                         | -989.0847545 (doublet)  |                   |                     |
| <b>(1NN-2H)<sup>-</sup>-H<sup>+</sup></b> | -989.1672075 (CS)       |                   |                     |
| <b>2NN-2H</b>                             | -989.7035074 (BS)       | 3.22              | 14.58               |
| <b>(2NN-2H)-H</b>                         | -989.0850475 (doublet)  |                   |                     |
| <b>(2NN-2H)<sup>-</sup>-H<sup>+</sup></b> | -989.1674925 (CS)       |                   |                     |
| <b>1NN-Mg</b>                             | -1188.6667299 (BS)      | 3.30              | 14.69               |
| <b>(1NN-Mg)-H</b>                         | -1188.0456731 (doublet) |                   |                     |
| <b>(1NN-Mg)<sup>-</sup>-H<sup>+</sup></b> | -1188.1265382 (CS)      |                   |                     |
| <b>2NN-Mg</b>                             | -1188.6668818 (BS)      | 3.29              | 14.70               |
| <b>(2NN-Mg)-H</b>                         | -1188.0460726 (doublet) |                   |                     |
| <b>(2NN-Mg)<sup>-</sup>-H<sup>+</sup></b> | -1188.1265664 (CS)      |                   |                     |
| <b>1NN-Zn</b>                             | -2767.8585592 (BS)      | 3.31              | 14.67               |
| <b>(1NN-Zn)-H</b>                         | -2767.2373177 (doublet) |                   |                     |
| <b>(1NN-Zn)<sup>-</sup>-H<sup>+</sup></b> | -2767.3196120 (CS)      |                   |                     |
| <b>2NN-Zn</b>                             | -2767.8589703 (BS)      | 3.30              | 14.67               |
| <b>(2NN-Zn)-H</b>                         | -2767.2377778 (doublet) |                   |                     |
| <b>(2NN-Zn)<sup>-</sup>-H<sup>+</sup></b> | -2767.3198852 (CS)      |                   |                     |

**Table S8.** The Calculated Energies of the Broken-Symmetry Open-Shell Singlet ( $E_{BS}/au$ ) Ground States and Energies ( $\Delta E_{PT}/eV$ ) of Proton Transfer to a  $H_2O$  as a Proton Acceptor (i.e. Solvent-Assisted Deprotonation) for All Dipyrrole-Inverted Porphine/Porphyrins at the B3LYP/6-311G (d,p) Level. The Transfer Process Is Defined as: For Example for the (1NN-2H) $\cdots OH_2 \rightarrow ((1NN-2H)_{(-H^+)^-})\cdots H^+OH_2$  Process,  $\Delta E_{PT}>0$  means endothermic.

| <b>Molecules</b>                                        | <b><math>E_{BS}</math></b> | <b><math>\Delta E_{PT}</math></b> |
|---------------------------------------------------------|----------------------------|-----------------------------------|
| <b>(1NN-2H)<math>\cdots OH_2</math></b>                 | -1066.1995238              | 1.69                              |
| <b><math>((1NN-2H)_{(-H^+)^-})\cdots H^+OH_2</math></b> | -1066.1374559              |                                   |
| <b>(2NN-2H)<math>\cdots OH_2</math></b>                 | -1066.1995077              | 1.67                              |
| <b><math>((2NN-2H)_{(-H^+)^-})\cdots H^+OH_2</math></b> | -1066.1383050              |                                   |
| <b>(1NN-Mg)<math>\cdots OH_2</math></b>                 | -1265.1605430              | 1.77                              |
| <b><math>((1NN-Mg)_{(-H^+)^-})\cdots H^+OH_2</math></b> | -1265.0952500              |                                   |
| <b>(2NN-Mg)<math>\cdots OH_2</math></b>                 | -1265.1605559              | 1.78                              |
| <b><math>((2NN-Mg)_{(-H^+)^-})\cdots H^+OH_2</math></b> | -1265.0952413              |                                   |
| <b>(1NN-Zn)<math>\cdots OH_2</math></b>                 | -2844.3538254              | 1.97                              |
| <b><math>((1NN-Zn)_{(-H^+)^-})\cdots H^+OH_2</math></b> | -2844.2816143              |                                   |
| <b>(2NN-Zn)<math>\cdots OH_2</math></b>                 | -2844.3540425              | 1.93                              |
| <b><math>((2NN-Zn)_{(-H^+)^-})\cdots H^+OH_2</math></b> | -2844.2832612              |                                   |

**Table S9.** The Calculated Energies of the Ground States (**E/au**) and Single Electron or Dielectron Ionization Potentials (**IPs/eV**) at the B3LYP/6-311G (d,p) Level. For a Comparison, the Calculated and Experimental (in Parentheses) Values for Porphine (P-2H) Are Also Given.

| <b>Molecules</b>             | <b>E</b>                | <b>IPa(-e)</b> | <b>IPa(-2e)</b> |
|------------------------------|-------------------------|----------------|-----------------|
| <b>P-2H</b>                  | -989.7867605 (CS)       | 6.71 (6.9)     | 17.36           |
| <b>P-2H<sup>+</sup></b>      | -989.5403007 (doublet)  |                |                 |
| <b>P-2H<sup>2+</sup></b>     | -989.1487879 (CS)       |                |                 |
| <b>1NN-2H</b>                | -989.7032246 (BS)       | 5.60           | 15.37           |
| <b>(1NN-2H)<sup>+</sup></b>  | -989.4974550 (doublet)  |                |                 |
| <b>(1NN-2H)<sup>2+</sup></b> | -989.1384846 (CS)       |                |                 |
| <b>2NN-2H</b>                | -989.7035074 (BS)       | 5.60           | 15.33           |
| <b>(2NN-2H)<sup>+</sup></b>  | -989.4977622 (doublet)  |                |                 |
| <b>(2NN-2H)<sup>2+</sup></b> | -989.1400755 (CS)       |                |                 |
| <b>1NN-Mg</b>                | -1188.6667299 (BS)      | 5.48           | 15.01           |
| <b>(1NN-Mg)<sup>+</sup></b>  | -1188.4652007 (doublet) |                |                 |
| <b>(1NN-Mg)<sup>2+</sup></b> | -1188.1149330 (CS)      |                |                 |
| <b>2NN-Mg</b>                | -1188.6668818 (BS)      | 5.47           | 14.94           |
| <b>(2NN-Mg)<sup>+</sup></b>  | -1188.4656968 (doublet) |                |                 |
| <b>(2NN-Mg)<sup>2+</sup></b> | -1188.1176973 (CS)      |                |                 |
| <b>1NN-Zn</b>                | -2767.8585592 (BS)      | 5.55           | 15.16           |
| <b>(1NN-Zn)<sup>+</sup></b>  | -2767.6546029 (doublet) |                |                 |
| <b>(1NN-Zn)<sup>2+</sup></b> | -2767.3014929 (CS)      |                |                 |
| <b>2NN-Zn</b>                | -2767.8589703 (BS)      | 5.54           | 15.10           |
| <b>(2NN-Zn)<sup>+</sup></b>  | -2767.6552481 (doublet) |                |                 |
| <b>(2NN-Zn)<sup>2+</sup></b> | -2767.3039389 (CS)      |                |                 |

## 2. The Process Analyses of the CH/NH Exchange Effect

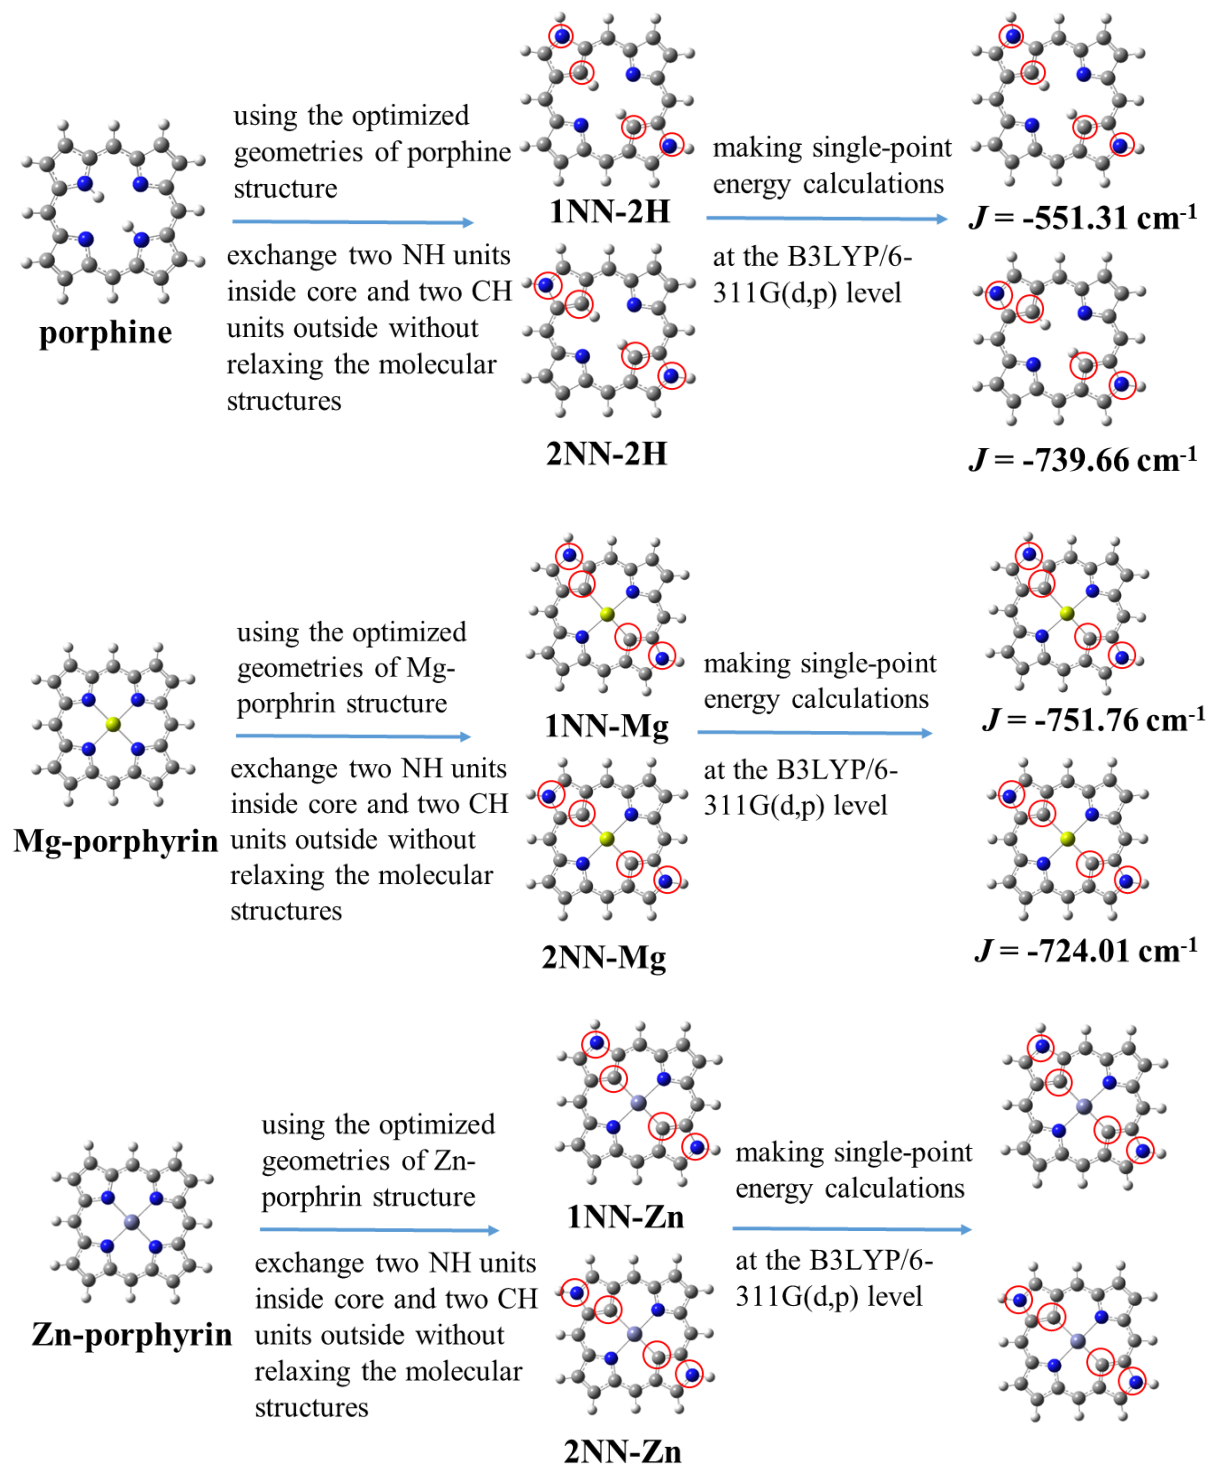

**Figure S1.** The process analyses of the CH/NH exchange effect for molecules (1NN-2H, 2NN-2H, 1NN-Mg, 2NN-Mg, 1NN-Zn and 2NN-Zn).



### 3. The Process Analyses of the Pure Geometric Deformation Effect

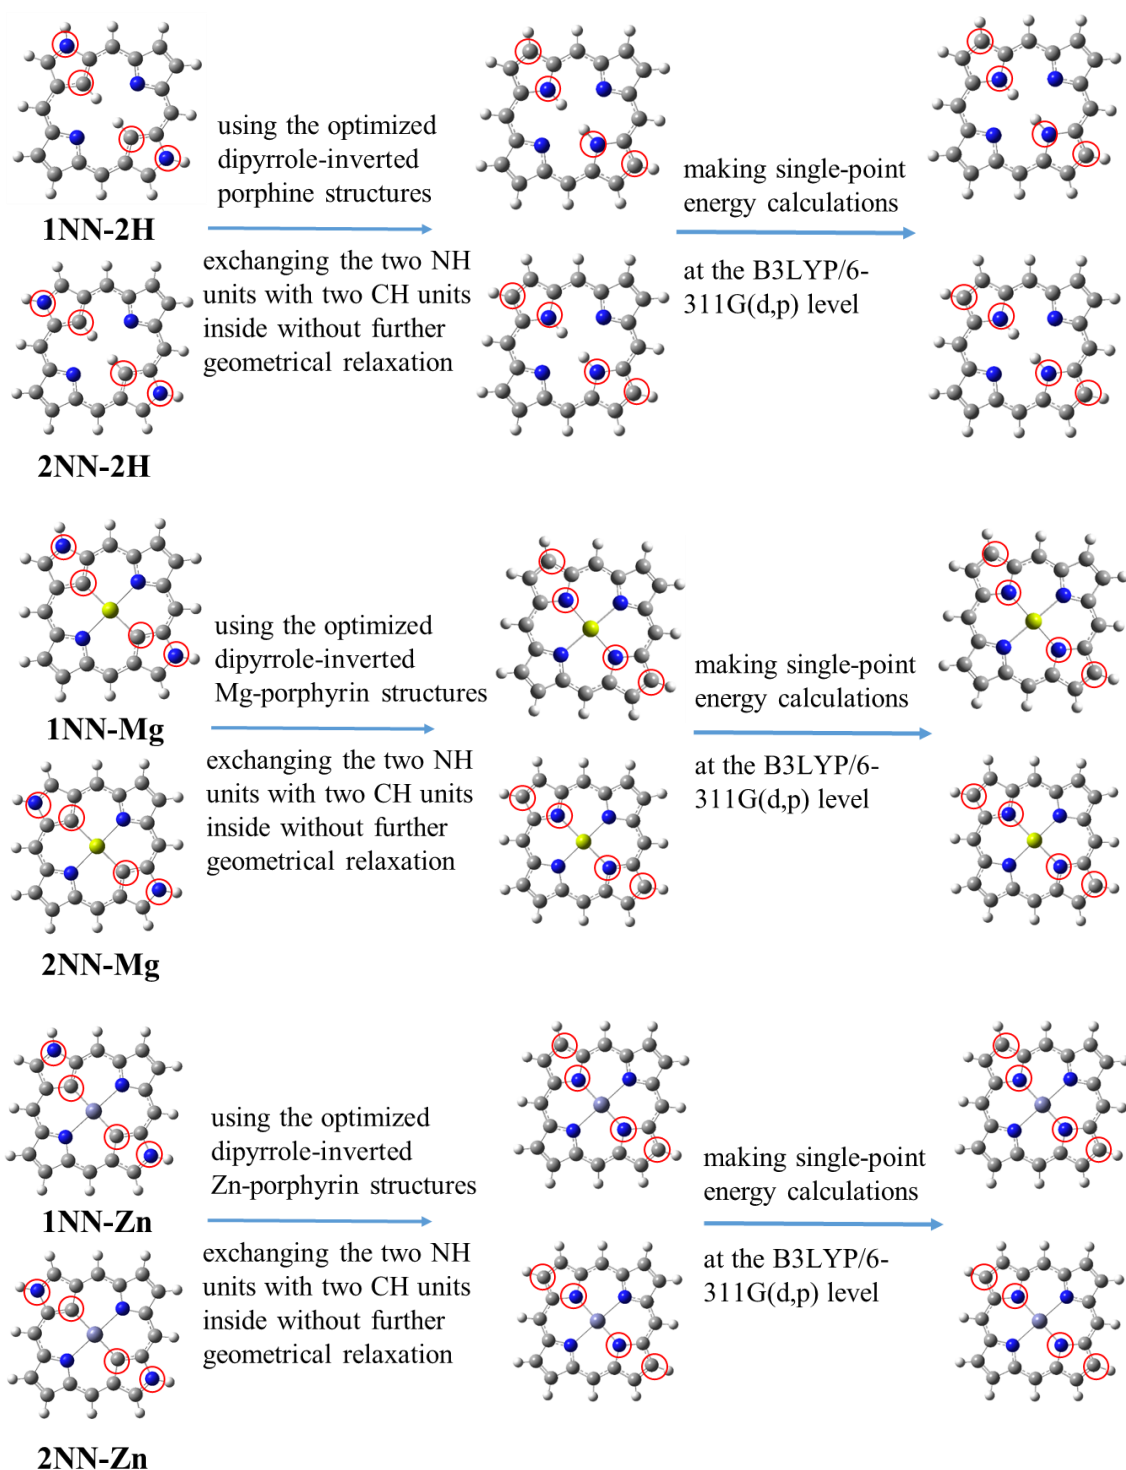

**Figure S2.** The process analyses of the pure geometric deformation effect for molecules (1NN-2H, 2NN-2H, 1NN-Mg, 2NN-Mg, 1NN-Zn and 2NN-Zn).

#### 4. The Optimized Bond Lengths of the N-Zn, C-Zn, N-Mg and C-Mg Bonds

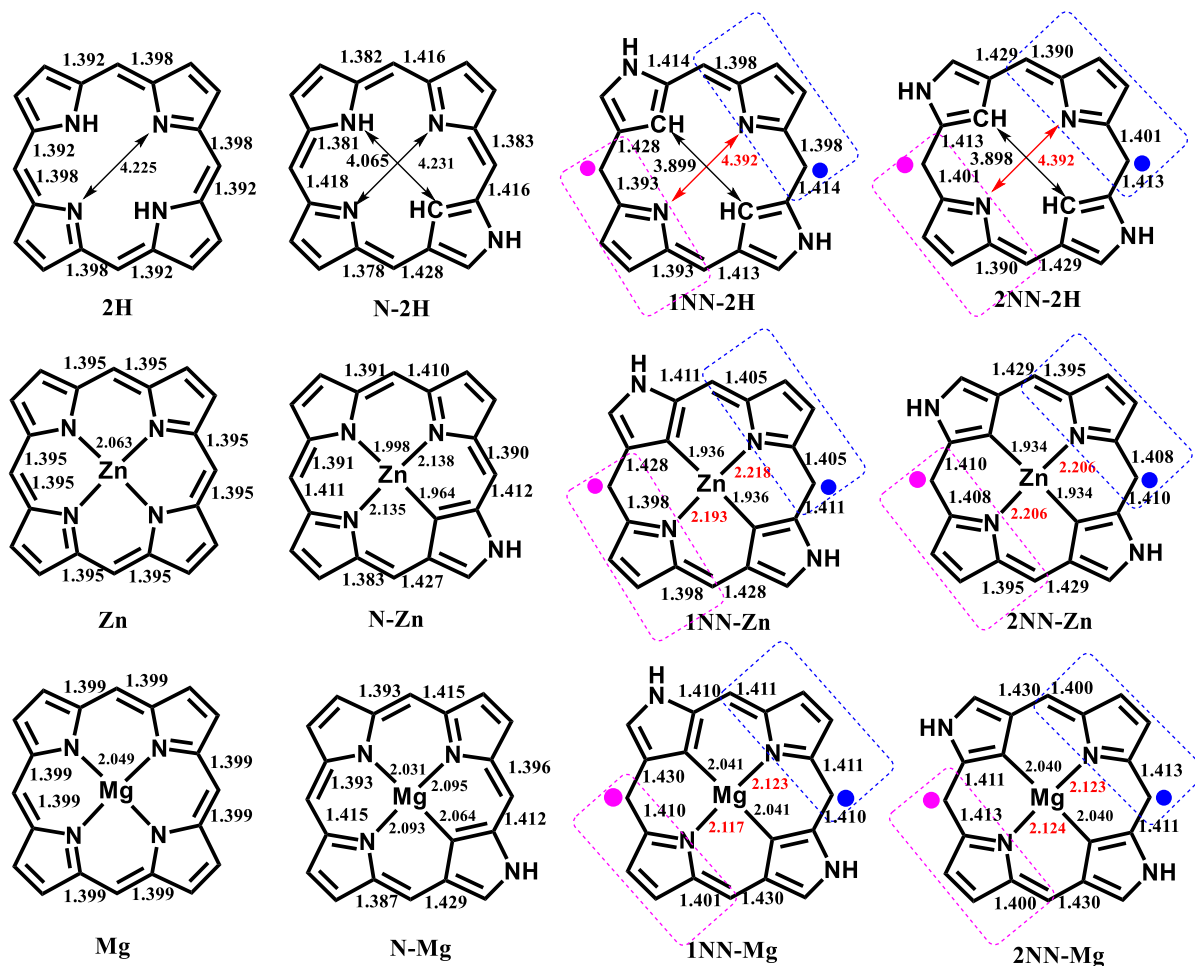

**Figure S3.** The optimized bond lengths for porphine, Mg/Zn-porphyrin, monopyrrole-inverted (N-2H, N-Zn and N-Mg) and dipyrrole-inverted porphyrin derivatives (1NN-2H, 2NN-2H, 1NN-Zn, 2NN-Zn, 1NN-Mg and 2NN-Mg).

## 5. The Spin Density Map and Spin Alternation Analysis

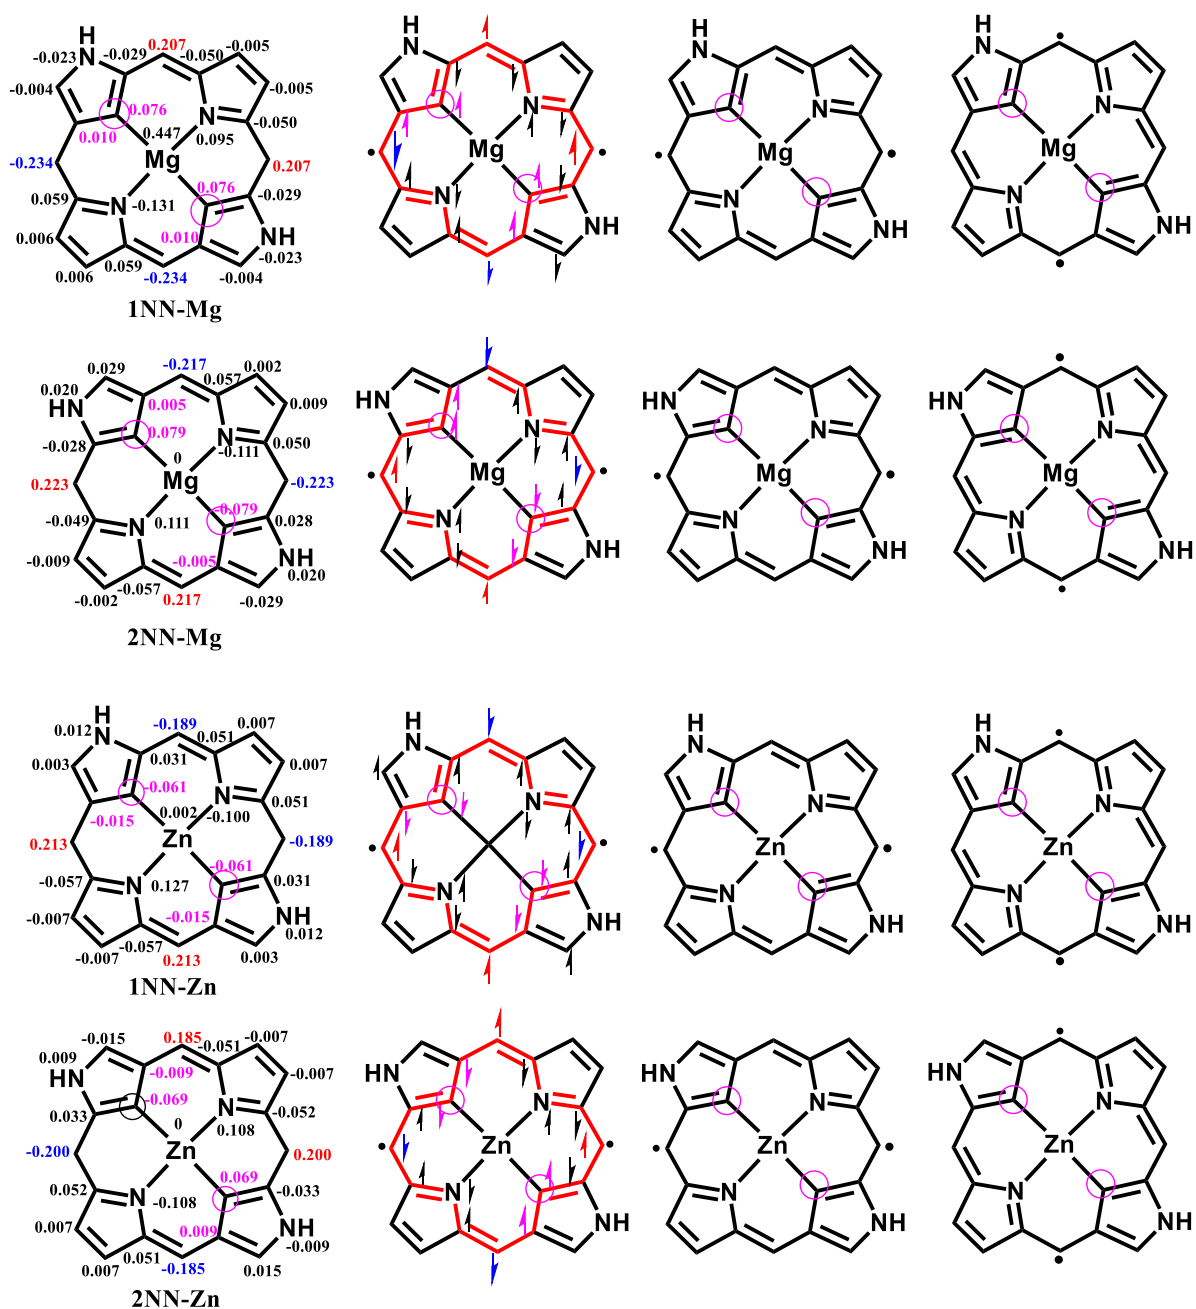

**Figure S4.** The spin density map and spin alternation analysis for the ground state dipyrrole-inverted Mg/Zn-porphyrin derivatives (1NN-Mg, 2NN-Mg, 1NN-Mg and 2NN-Mg). The inner  $\pi$ -conjugation circuits are indicated by the red-colored lines, and the pink-circled denote the =CH- unit and the pink number and arrow donate the same spin orientation of the =CH- unit and the adjacent one C atom.

## 6. The NICS(1) Values of All Porphyrin and Derivative

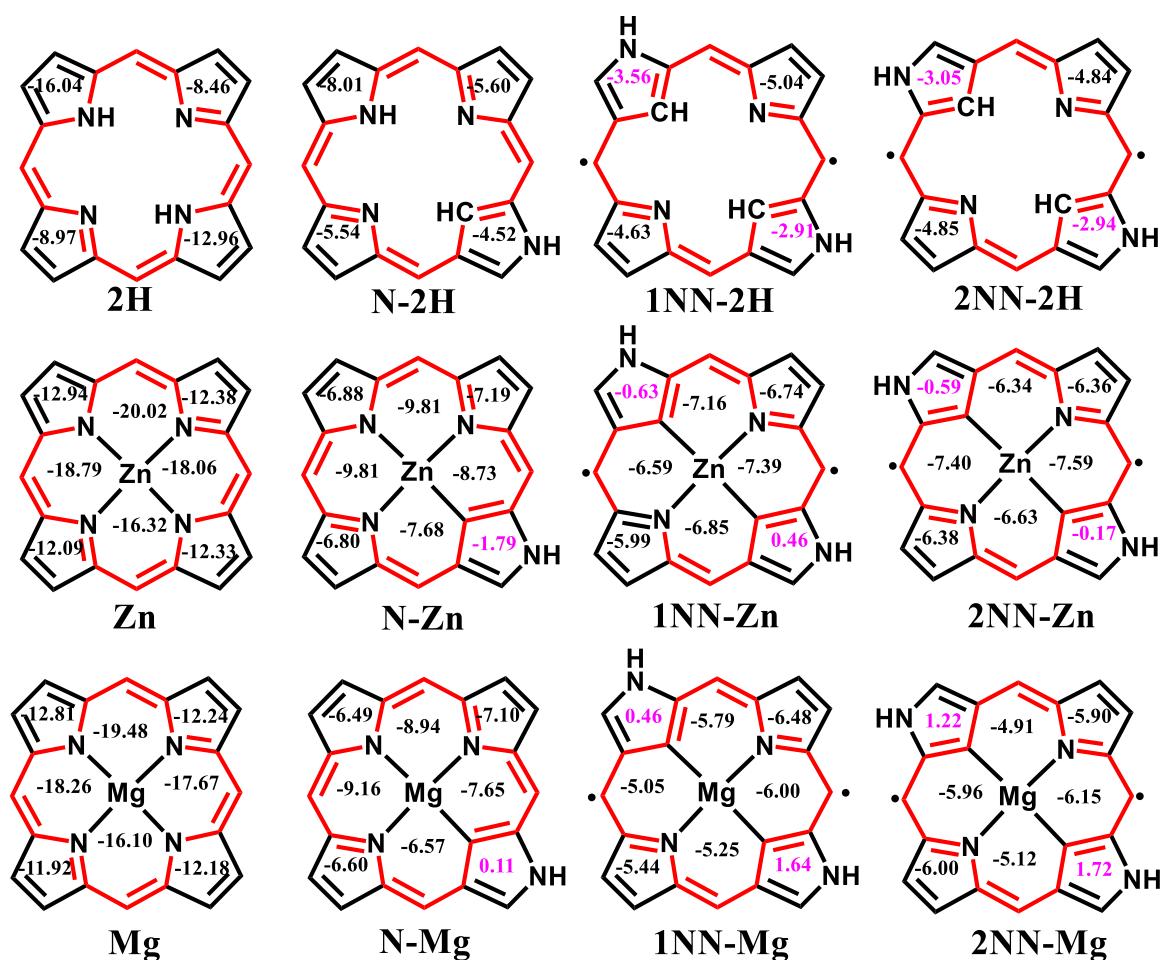

**Figure S5.** Calculated NICS (1) value (ppm) of each ring of all porphine and Mg/Zn-porphyrin and corresponding pyrrole-inverted porphine and Mg/Zn-porphyrin molecules. The inner  $\pi$ -conjugation circuits are indicated by the red-colored lines.

## 7. The Optimized Molecular Structures

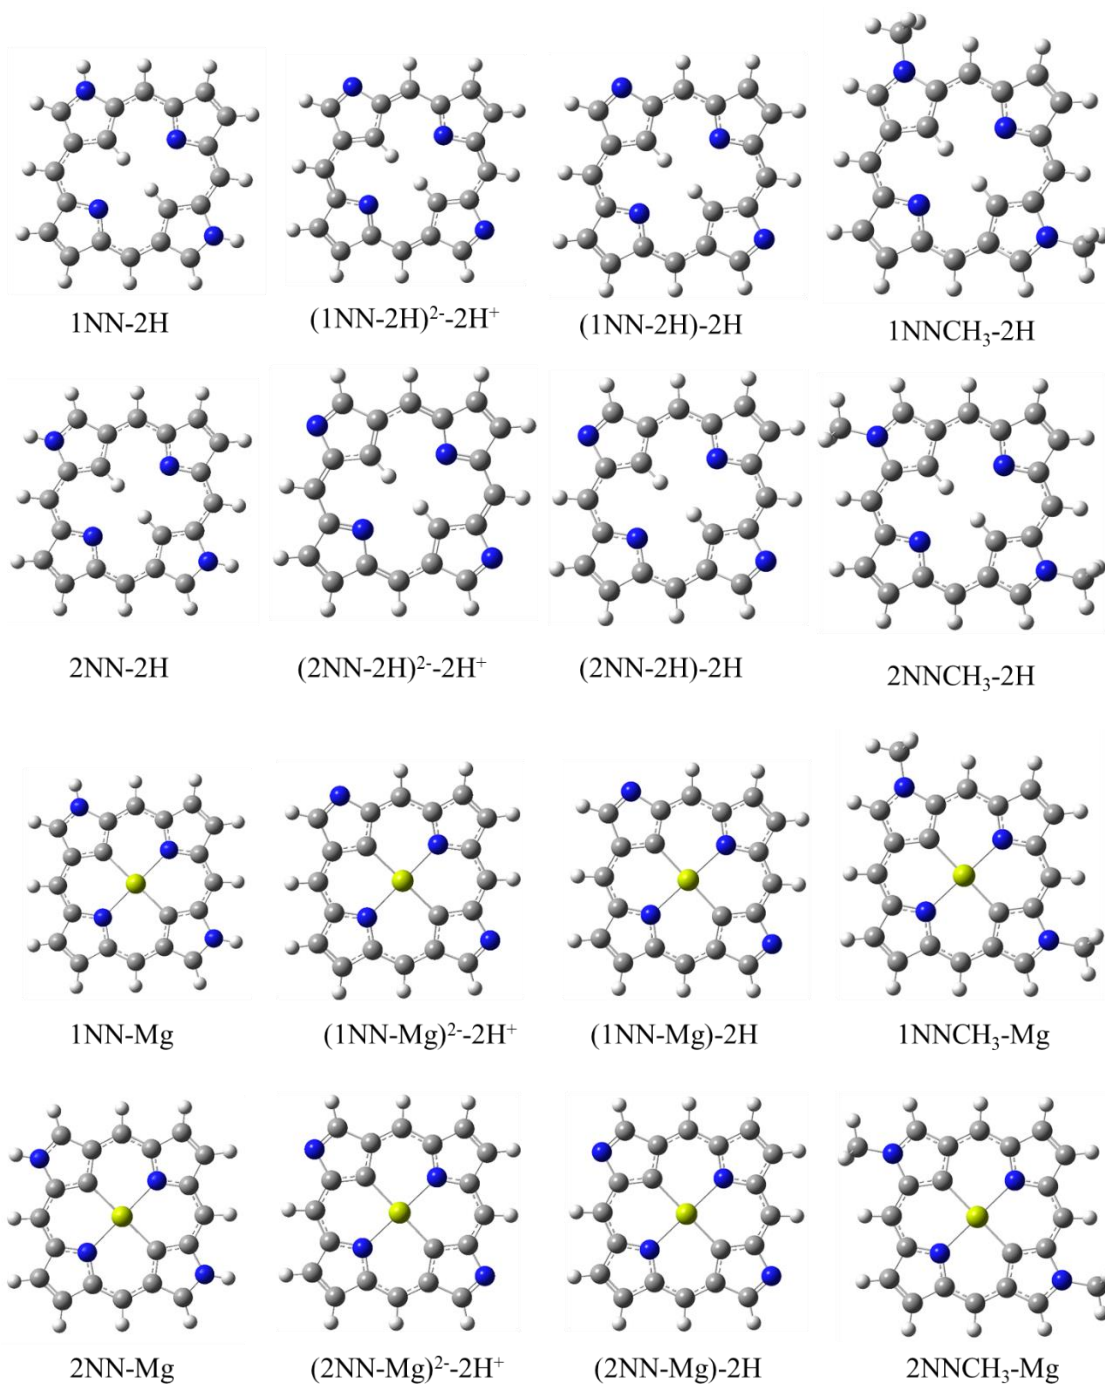

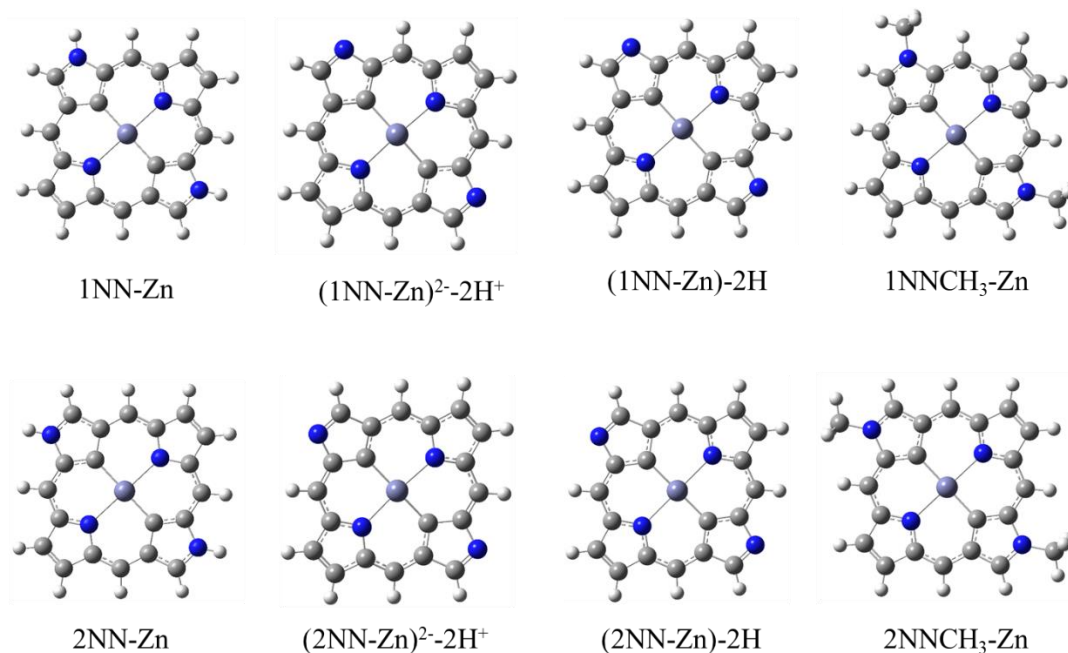

**Figure S6.** The optimized ground state molecular structures of dipyrrole-inverted porphine/porphyrin derivatives (1NN-2H, 2NN-2H, 1NN-Mg, 2NN-Mg, 1NN-Zn, and 2NN-Zn) and their corresponding doubly deprotonated structures ( $(1\text{NN-}2\text{H})^{2-}\cdot 2\text{H}^+$ ,  $(2\text{NN-}2\text{H})^{2-}\cdot 2\text{H}^+$ ,  $(1\text{NN-Mg})^{2-}\cdot 2\text{H}^+$ ,  $(2\text{NN-Mg})^{2-}\cdot 2\text{H}^+$ ,  $(1\text{NN-Zn})^{2-}\cdot 2\text{H}^+$  and  $(2\text{NN-Zn})^{2-}\cdot 2\text{H}^+$ ), doubly dehydrogenated structures ( $(1\text{NN-}2\text{H})\text{-}2\text{H}$ ,  $(2\text{NN-}2\text{H})\text{-}2\text{H}$ ,  $(1\text{NN-Mg})\text{-}2\text{H}$ ,  $(2\text{NN-Mg})\text{-}2\text{H}$ ,  $(1\text{NN-Zn})\text{-}2\text{H}$  and  $(2\text{NN-Zn})\text{-}2\text{H}$ ), and N,N-methylated structures (1NNCH<sub>3</sub>-2H, 2NNCH<sub>3</sub>-2H, 1NNCH<sub>3</sub>-Mg, 2NNCH<sub>3</sub>-Mg, 1NNCH<sub>3</sub>-Zn and 2NNCH<sub>3</sub>-Zn).

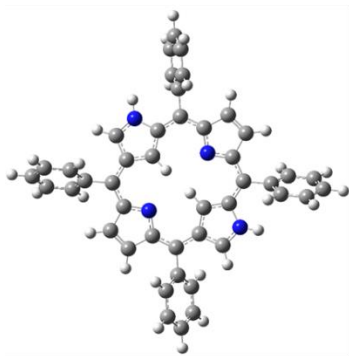

(1NN-2H)(C<sub>6</sub>H<sub>5</sub>)<sub>4</sub>

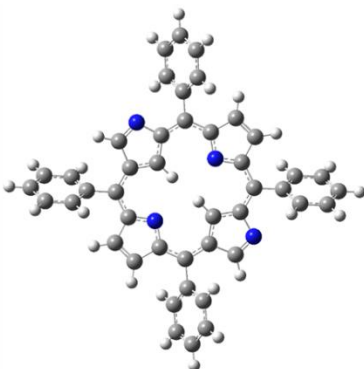

(1NN-2H)(C<sub>6</sub>H<sub>5</sub>)<sub>4</sub><sup>2-</sup>-2H<sup>+</sup>

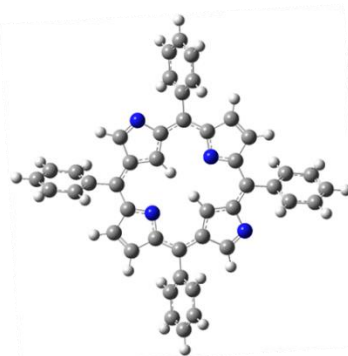

(1NN-2H)(C<sub>6</sub>H<sub>5</sub>)<sub>4</sub>-2H

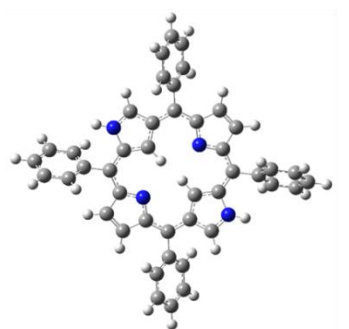

(2NN-2H)(C<sub>6</sub>H<sub>5</sub>)<sub>4</sub>

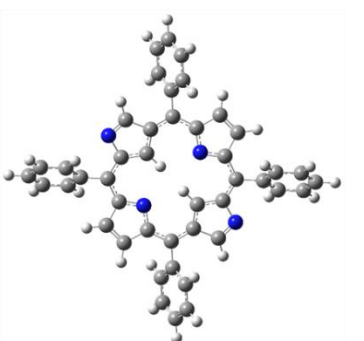

(2NN-2H)(C<sub>6</sub>H<sub>5</sub>)<sub>4</sub><sup>2-</sup>-2H<sup>+</sup>

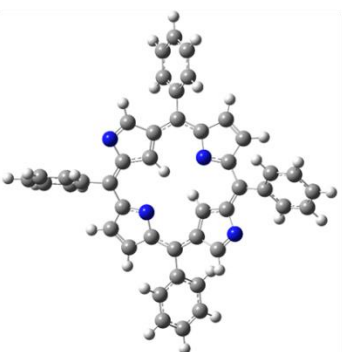

(2NN-2H)(C<sub>6</sub>H<sub>5</sub>)<sub>4</sub>-2H

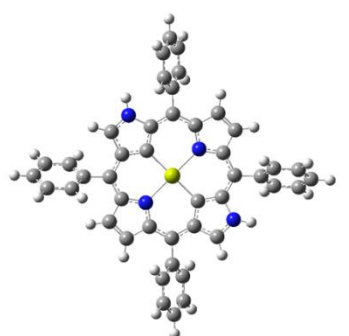

(1NN-Mg)(C<sub>6</sub>H<sub>5</sub>)<sub>4</sub>

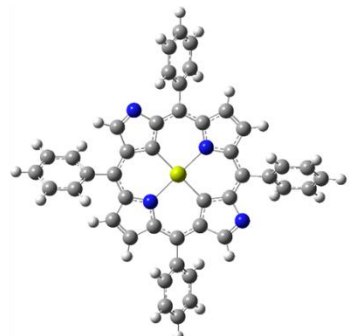

(1NN-Mg)(C<sub>6</sub>H<sub>5</sub>)<sub>4</sub><sup>2-</sup>-2H<sup>+</sup>

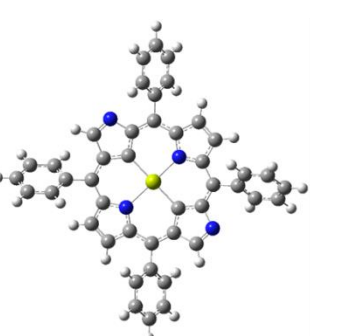

(1NN-Mg)(C<sub>6</sub>H<sub>5</sub>)<sub>4</sub>-2H

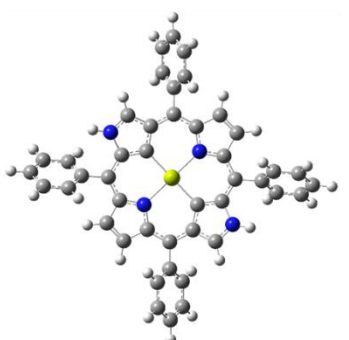

(2NN-Mg)(C<sub>6</sub>H<sub>5</sub>)<sub>4</sub>

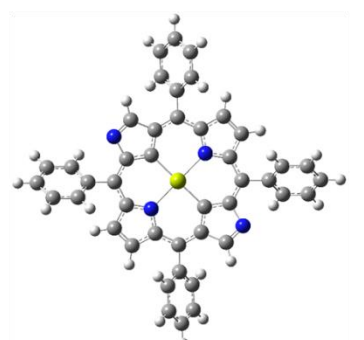

(2NN-Mg)(C<sub>6</sub>H<sub>5</sub>)<sub>4</sub><sup>2-</sup>-2H<sup>+</sup>

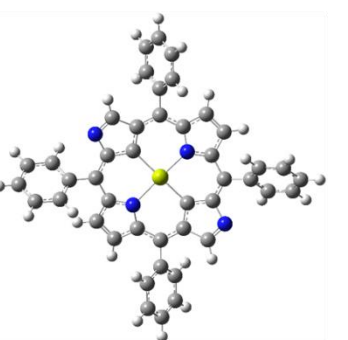

(2NN-Mg)(C<sub>6</sub>H<sub>5</sub>)<sub>4</sub>-2H

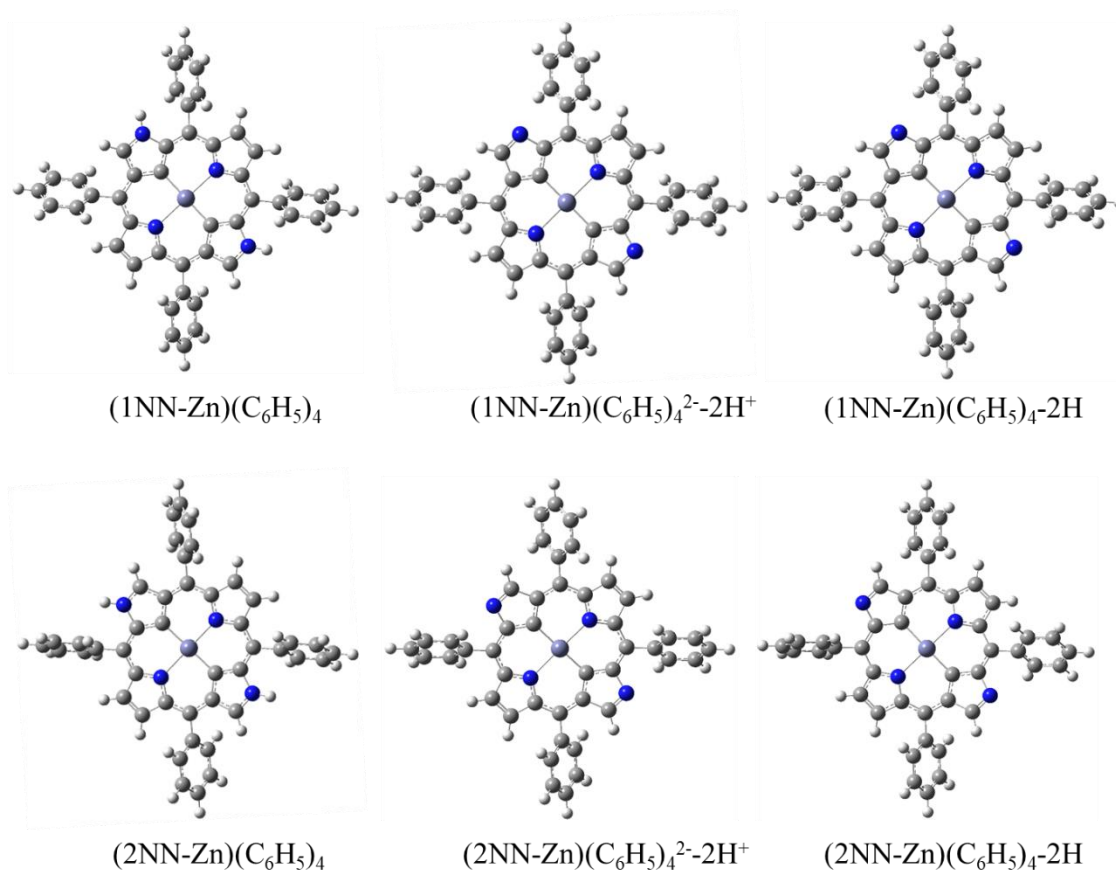

**Figure S7.** The optimized ground state molecular structures of dipyrrole-inverted Tetraphenyl porphyrin derivatives of porphine, Mg/Zn-porphyrin ((1NN-2H)(C<sub>6</sub>H<sub>5</sub>)<sub>4</sub>, (2NN-2H)(C<sub>6</sub>H<sub>5</sub>)<sub>4</sub>, (1NN-Mg)(C<sub>6</sub>H<sub>5</sub>)<sub>4</sub>, (2NN-Mg)(C<sub>6</sub>H<sub>5</sub>)<sub>4</sub>, (1NN-Zn)(C<sub>6</sub>H<sub>5</sub>)<sub>4</sub> and (2NN-Zn)(C<sub>6</sub>H<sub>5</sub>)<sub>4</sub>) and their corresponding doubly deprotonated structures ((1NN-2H)(C<sub>6</sub>H<sub>5</sub>)<sub>4</sub><sup>2-</sup>-2H<sup>+</sup>, (2NN-2H)(C<sub>6</sub>H<sub>5</sub>)<sub>4</sub><sup>2-</sup>-2H<sup>+</sup>, (1NN-Mg)(C<sub>6</sub>H<sub>5</sub>)<sub>4</sub><sup>2-</sup>-2H<sup>+</sup>, (2NN-Mg)(C<sub>6</sub>H<sub>5</sub>)<sub>4</sub><sup>2-</sup>-2H<sup>+</sup>, (1NN-Zn)(C<sub>6</sub>H<sub>5</sub>)<sub>4</sub><sup>2-</sup>-2H<sup>+</sup> and (2NN-Zn)(C<sub>6</sub>H<sub>5</sub>)<sub>4</sub><sup>2-</sup>-2H<sup>+</sup>) and doubly dehydrogenated structures ((1NN-2H)(C<sub>6</sub>H<sub>5</sub>)<sub>4</sub>-2H, (2NN-2H)(C<sub>6</sub>H<sub>5</sub>)<sub>4</sub>-2H, (1NN-Mg)(C<sub>6</sub>H<sub>5</sub>)<sub>4</sub>-2H, (2NN-Mg)(C<sub>6</sub>H<sub>5</sub>)<sub>4</sub>-2H, (1NN-Zn)(C<sub>6</sub>H<sub>5</sub>)<sub>4</sub>-2H and (2NN-Zn)(C<sub>6</sub>H<sub>5</sub>)<sub>4</sub>-2H).
